# Supplementary material
Source: PubMed Central journal article supplement (PMC7966046)
Supplement: 2489_tables.pdf [file 2489_tables.pdf]

**On-line Table 1: Demographic data and neuropsychological testing of HIV-negative CM patients and healthy controls**

|                            | Patients (n = 15) | Controls (n = 15) | F or X value | P value |
|----------------------------|-------------------|-------------------|--------------|---------|
| Age at follow-up (year)    | 54.5 ± 13.5       | 53.2 ± 14.0       |              | 0.792   |
| Sex (male)                 | 14 (93.3)         | 14 (93.3)         |              | 0.759   |
| Years of education         | 10.9 ± 4.9        | 11.9 ± 4.8        |              | 0.551   |
| WAIS-III                   |                   |                   |              |         |
| General knowledge          | 9.7 ± 2.0         | 11.1 ± 3.4        | 0.621        | 0.438   |
| Digit span                 | 8.5 ± 3.5         | 11.9 ± 3.6        | 6.181        | 0.020*  |
| Vocabulary ability         | 9.6 ± 3.5         | 11.0 ± 3.1        | 0.427        | 0.519   |
| Arithmetic                 | 9.7 ± 3.1         | 11.1 ± 2.6        | 2.135        | 0.155   |
| Letter–number sequencing   | 8.1 ± 4.5         | 10.6 ± 4.3        | 1.998        | 0.171   |
| Comprehension              | 9.7 ± 3.5         | 11.8 ± 3.3        | 1.021        | 0.321   |
| Similarities               | 8.5 ± 4.0         | 10.9 ± 2.5        | 1.936        | 0.175   |
| Picture completion         | 7.9 ± 3.0         | 10.1 ± 3.3        | 3.438        | 0.075   |
| Matrix reasoning           | 9.3 ± 2.8         | 10.4 ± 3.2        | 0.778        | 0.386   |
| Block design               | 9.1 ± 3.4         | 11.7 ± 2.5        | 5.947        | 0.022*  |
| Picture arrangement        | 9.7 ± 2.7         | 10.3 ± 3.3        | 0.206        | 0.654   |
| Digit symbol               | 8.9 ± 3.2         | 11.3 ± 3.6        | 3.629        | 0.068   |
| Object assembly            | 9.3 ± 2.8         | 10.4 ± 3.2        | 0.778        | 0.386   |
| Verbal Comprehension Index | 96.3 ± 14.3       | 105.2 ± 14.7      | 2.707        | 0.112   |
| Perceptual Reasoning Index | 93.1 ± 14.9       | 104.5 ± 13.9      | 5.137        | 0.032*  |
| Working Memory Index       | 92.3 ± 17.3       | 108.2 ± 17.1      | 6.678        | 0.016*  |
| CASI                       |                   |                   |              |         |
| Mental manipulation        | 8.7 ± 1.7         | 9.4 ± 1.1         | 2.557        | 0.122   |
| Short-term memory          | 8.6 ± 3.5         | 10.4 ± 2.0        | 3.043        | 0.093   |
| Abstract thinking          | 9.4 ± 2.3         | 10.7 ± 1.3        | 4.560        | 0.042*  |
| Drawing                    | 9.2 ± 1.5         | 9.9 ± 0.3         | 3.348        | 0.079   |
| Semantic verbal fluencies  | 7.1 ± 2.7         | 8.7 ± 1.9         | 3.856        | 0.060   |
| Attention                  | 7.3 ± 1.1         | 7.7 ± 0.6         | 1.966        | 0.173   |
| Language                   | 9.8 ± 0.4         | 9.9 ± 0.2         | 1.147        | 0.294   |
| Long-term memory           | 9.7 ± 0.7         | 9.7 ± 0.7         | 0.010        | 0.923   |
| Orientation                | 15.8 ± 3.8        | 17.7 ± 1.1        | 3.053        | 0.092   |
| CASI total score           | 85.6 ± 14.1       | 94.3 ± 5.0        | 5.573        | 0.026*  |
| Mean cognitive scores      | 91.8 ± 13.7       | 103.0 ± 10.8      | 7.051        | 0.013*  |

\* indicates  $P < 0.05$ .

**On-line Table 2: Neuroimaging findings of HIV-negative CM patients following anti-fungal treatment**

| Patient/Age (years)/Sex | CSF Cryptococcal-Antigen Titer | MR Imaging Finding during Acute Phase                                                                                           | MR Imaging Finding during Follow-Up                              | Intervals Between Both Discharge and Discontinue Antifungal Therapy from Hospital and Follow-Up Study (months) |
|-------------------------|--------------------------------|---------------------------------------------------------------------------------------------------------------------------------|------------------------------------------------------------------|----------------------------------------------------------------------------------------------------------------|
| 1/39/M                  | 1:8192                         | No active lesion                                                                                                                | No active lesion                                                 | 89                                                                                                             |
| 2/63/M                  | 1:64                           | Meningeal/gyral enhancement (+); right basal ganglia infarction; bilateral cerebellar hyperintense; bilateral subdural effusion | Bilateral cerebellum hyperintense                                | 43                                                                                                             |
| 3/65/M                  | 1:256                          | Bilateral basal ganglia infarction                                                                                              | No active lesion                                                 | 101                                                                                                            |
| 4/58/M                  | 1:1024                         | Meningeal-gyral enhancement (+); right basal ganglia infarction; bilateral subdural effusion                                    | Right frontal and left parietal hyperintense                     | 72                                                                                                             |
| 5/72/M                  | 1:8                            | Hydrocephalus (+); Meningeal-gyral enhancement (+); left temporal cerebritis                                                    | No active lesion                                                 | 4                                                                                                              |
| 6/54/M                  | 1:128                          | Meningeal-gyral enhancement (+); bilateral Vichow-Robin dilation                                                                | No active lesion                                                 | 12                                                                                                             |
| 7/71/F                  | 1:8                            | Bilateral Vichow-Robin dilation                                                                                                 | No active lesion                                                 | 96                                                                                                             |
| 8/56/M                  | 1:128                          | Hydrocephalus (+); right subdural effusion                                                                                      | No active lesion                                                 | 70                                                                                                             |
| 9/59/M                  | 1:1024                         | Meningeal/gyral enhancement (+)                                                                                                 | No active lesion                                                 | 49                                                                                                             |
| 10/56/M                 | 1:256                          | No active lesion (by CT)                                                                                                        | No active lesion                                                 | 122                                                                                                            |
| 11/27/M                 | 1:1024                         | Hydrocephalus (+); Meningeal/gyral enhancement (+)                                                                              | No active lesion                                                 | 97                                                                                                             |
| 12/65/M                 | 1:8                            | Hydrocephalus (+); meningeal/gyral enhancement (+); bilateral Vichow-Robin dilation                                             | Meningeal/gyral enhancement (+)                                  | 60                                                                                                             |
| 13/57/M                 | 1:1024                         | Hydrocephalus (+); Meningeal/gyral enhancement (+); cryptococcoma (+); pons, right occipital, bilateral parietal cerebritis     | Meningeal/gyral enhancement (+); bilateral parietal hyperintense | 3                                                                                                              |
| 14/45/M                 | 1:512                          | Bilateral cerebellar, right parietal cerebritis                                                                                 | No active lesion                                                 | 84                                                                                                             |
| 15/31/M                 | 1:512                          | Meningeal/gyral enhancement (+); right Vichow-Robin dilation                                                                    | Meningeal/gyral enhancement (+); right Virchow-Robin dilation    | 5                                                                                                              |
